# Supplementary material
Source: PubMed Central journal article supplement (PMC2981090)

# **Highly Diastereo- and Enantioselective Homoenolate Additions to Nitrones Catalyzed by *N*-Heterocyclic Carbenes**

**Eric M. Phillips, Troy E. Reynolds, and Karl A. Scheidt\***

*Department of Chemistry, Northwestern University,  
2145 Sheridan Road, Evanston, Illinois 60208*

## **Supporting Information**

|                                                                    |            |
|--------------------------------------------------------------------|------------|
| <i>General Information</i> .....                                   | <i>S2</i>  |
| <i>General Procedure for the Synthesis of Methyl Esters</i> .....  | <i>S2</i>  |
| <i>Procedure for Synthesis of <math>\gamma</math>-Lactam</i> ..... | <i>S7</i>  |
| <i>Selected NMR Spectra</i> .....                                  | <i>S8</i>  |
| <i>HPLC Traces of Racemic and Enantioenriched Compounds</i> .....  | <i>S14</i> |
| <i>X-Ray Crystallography of 7</i> .....                            | <i>S25</i> |

## General Information

All reactions were carried out under a nitrogen atmosphere in flame-dried glassware with magnetic stirring. CH<sub>2</sub>Cl<sub>2</sub> was purified by passage through a bed of activated alumina.<sup>1</sup> Reagents were purified prior to use unless otherwise stated following the guidelines of Perrin and Armarego.<sup>2</sup> Purification of reaction products was carried out by flash chromatography using EM Reagent silica gel 60 (230-400 mesh). Analytical thin layer chromatography was performed on EM Reagent 0.25 mm silica gel 60-F plates. Visualization was accomplished with UV light and ceric ammonium nitrate stain or potassium permanganate stain followed by heating. Infrared spectra were recorded on a Perkin Elmer 1600 series FT-IR spectrometer. <sup>1</sup>H-NMR spectra were recorded on a Varian Inova 500 (500 MHz) spectrometer and are reported in ppm using solvent as an internal standard (CDCl<sub>3</sub> at 7.26 ppm). Data are reported as (ap = apparent, s = singlet, d = doublet, t = triplet, q = quartet, m = multiplet, b = broad; coupling constant(s) in Hz; integration. Proton-decoupled <sup>13</sup>C-NMR spectra were recorded on a Varian Inova 500 (125 MHz) spectrometer and are reported in ppm using solvent as an internal standard (CDCl<sub>3</sub> at 77.0 ppm). Mass spectra data were obtained on a Varian 1200 Quadrupole Mass Spectrometer and Micromass Quadro II Spectrometer.

All nitrones were prepared according to Fu.<sup>3</sup>

## General Procedure for the Synthesis of Methyl Esters

To an oven-dried 2-dram vial containing a magnetic stirring bar was added azolium salt **D** (19 mg, 0.04 mmol) and the corresponding nitrone (0.4 mmol) in a glove box. The heterogeneous mixture was diluted with CH<sub>2</sub>Cl<sub>2</sub> (2 mL, 0.1 M). The flask was then cooled to 0 °C. To the flask was added the corresponding aldehyde (0.2 mmol) and Et<sub>3</sub>N (6.1 μL, 0.04 mmol). The screw cap/septum was wrapped in parafilm and the vial was cooled to -25 °C. Upon consumption of the aldehyde (48 hr unless otherwise stated), the reaction was warmed to 0 °C and 0.2 mmol of NaOMe (1.0 M in MeOH) was added via syringe. After 1 min the reaction was diluted with diethyl ether and filtered through a pad of silica gel. The reaction mixture was concentrated and purified by flash column chromatography on silica gel with 10% diethyl ether in hexanes as an eluent to afford the corresponding methyl ester.

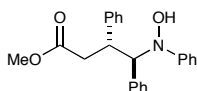

**(3R, 4R)-methyl-4-(hydroxy(phenyl)amino)-3,4-diphenylbutanoate (5)**: Prepared according to general procedure using *trans*-cinnamaldehyde (25 μL, 0.2 mmol) and (*Z*)-*N*-benzylideneaniline oxide (80 mg, 0.4 mmol) to afford 51 mg (70%) of **5** as a yellow solid. Analytical data for **5**: IR (film) 3531, 3061, 3024, 2955, 2941, 1737, 1488, 1267 cm<sup>-1</sup>; <sup>1</sup>H NMR (500 MHz, CDCl<sub>3</sub>) δ 7.41

1. Pangborn, A. B.; Giardello, M. A.; Grubbs, R. H.; Rosen, R. K.; Timmers, F. J. *Organometal.* **1996**, *15*, 1518-1520.
2. Perrin, D. D. and Armarego, W. L. *Purification of Laboratory Chemicals*; 3rd Ed., Pergamon Press, Oxford, 1988.
3. Lo, M. M. C.; Fu, G. C. *J. Am. Chem. Soc.* **2002**, *124*, 4572-4573.

(d,  $J = 7.3$  Hz, 2H), 7.37-7.34 (m, 2H), 7.28-7.21 (m, 6H), 7.08 (t,  $J = 7.8$  Hz, 2H), 6.83 (d,  $J = 8.3$  Hz, 2H), 6.80 (d,  $J = 7.3$ , 1H), 4.75 (s, 1H), 4.70 (d,  $J = 10.8$  Hz, 1H), 4.21-4.17 (m, 1H), 3.46 (s, 3H), 2.50 (d,  $J = 7.3$  Hz, 2H);  $^{13}\text{C}$  NMR (125 MHz,  $\text{CDCl}_3$ )  $\delta$  172.8, 151.7, 142.5, 136.1, 129.8, 128.9, 128.7, 128.6, 128.2 (x2), 127.2, 122.1, 117.6, 75.3, 51.8, 44.6, 39.2; LRMS (ES): Mass calcd for  $\text{C}_{23}\text{H}_{23}\text{NO}_3$   $[\text{M}+\text{H}]^+$ , 362. Found  $[\text{M}+\text{H}]^+$ , 362; Enantiomeric ratio was measured by HPLC (Chiralcel AD-H, 5% IPA/Hexanes, 1 mL/min,  $\text{Rt}_1 = 22.2$ ,  $\text{Rt}_2 = 25.8$ ).

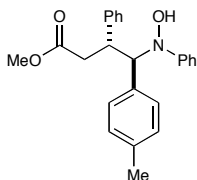

**(3R, 4R)-methyl-4-(hydroxy(phenyl)amino)-3-phenyl-4-p-tolylbutanoate (6):** Prepared according to general procedure using *trans*-cinnamaldehyde (25  $\mu\text{L}$ , 0.2 mmol) and (*Z*)-*N*-(4-methylbenzylidene)aniline oxide (85 mg, 0.4 mmol) to afford 53 mg (71%) of **6** as a yellow solid. Analytical data for **6**: IR (film) 3539, 3053, 2984, 2955, 1733, 1263  $\text{cm}^{-1}$ ;  $^1\text{H}$  NMR (500 MHz,  $\text{CDCl}_3$ )  $\delta$  7.41 (d,  $J = 7.4$  Hz, 2H), 7.35 (m, 2H), 7.24 (m, 1H), 7.17 (d,  $J = 7.8$  Hz, 2H), 7.09 (t,  $J = 7.8$  Hz, 2H), 7.02 (d,  $J = 7.3$  Hz, 2H), 6.83 (d,  $J = 7.8$  Hz, 2H), 6.79 (m, 1H), 4.69 (m, 2H), 4.16 (m, 1H), 3.45 (s, 3H), 2.49 (m, 2H), 2.26 (s, 3H);  $^{13}\text{C}$  NMR (125 MHz,  $\text{CDCl}_3$ )  $\delta$  172.8, 151.7, 142.6, 137.6, 132.9, 129.6, 128.9, 128.5, 128.3, 128.1, 127.1, 121.9, 117.4, 47.8, 51.7, 44.6, 39.2, 21.3; LRMS (ES): Mass calcd for  $\text{C}_{24}\text{H}_{25}\text{NO}_3$   $[\text{M}+\text{H}]^+$ , 376. Found  $[\text{M}+\text{H}]^+$ , 376; Enantiomeric ratio was measured by HPLC (Chiralcel AD-H, 5% IPA/Hexanes, 1 mL/min,  $\text{Rt}_1 = 19.1$ ,  $\text{Rt}_2 = 31.7$ ).

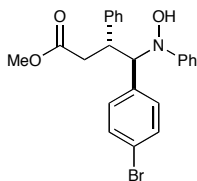

**(3R, 4R)-methyl-4-(4-bromophenyl)-4-(hydroxy(phenyl)amino)-3-phenylbutanoate (7):** Prepared according to general procedure using *trans*-cinnamaldehyde (25  $\mu\text{L}$ , 0.2 mmol) and (*Z*)-*N*-(4-bromobenzylidene)aniline oxide (111 mg, 0.4 mmol) to afford 62 mg (68%) of **7** as a yellow solid. Analytical data for **7**: IR (film) 3531, 3049, 2988, 2951, 2310, 1729, 1492, 1263  $\text{cm}^{-1}$ ;  $^1\text{H}$  NMR (500 MHz,  $\text{CDCl}_3$ )  $\delta$  7.40-7.33 (m, 6H), 7.27 (m, 1H), 7.15 (d,  $J = 8.3$  Hz, 2H), 7.10 (t,  $J = 7.8$  Hz, 2H), 6.83-6.82 (m, 3H), 4.80 (s, 1H), 4.67 (d,  $J = 10.8$  Hz, 1H), 4.15-4.10 (m, 1H), 3.47 (s, 3H), 2.49-2.47 (m, 2H);  $^{13}\text{C}$  NMR (125 MHz,  $\text{CDCl}_3$ )  $\delta$  172.7, 151.5, 142.2, 135.2, 131.5, 131.4, 129.4, 129.0, 128.7, 128.1, 127.3, 122.2, 117.7, 74.8, 51.9, 44.6, 39.1; LRMS (ES): Mass calcd for  $\text{C}_{23}\text{H}_{22}\text{BrNO}_3$   $[\text{M}]^+$ , 439. Found  $[\text{M}]^+$ , 439; Enantiomeric ratio was measured by HPLC (Chiralcel AD-H, 5% IPA/Hexanes, 1 mL/min,  $\text{Rt}_1 = 17.1$ ,  $\text{Rt}_2 = 27.1$ ).

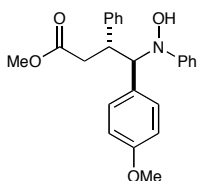

**(3R, 4R)-methyl-4-(hydroxy(phenyl)amino)-4-(4-methoxyphenyl)-3-phenylbutanoate (8):** Prepared according to general procedure using *trans*-cinnamaldehyde (25  $\mu$ L, 0.2 mmol) and (*Z*)-*N*-(4-methoxybenzylidene)aniline oxide (91 mg, 0.4 mmol) to afford 49 mg (62%) of **8** as a yellow solid. Analytical data for **8**: IR (film) 3435, 3062, 2953, 2838, 1734, 1598, 1357  $\text{cm}^{-1}$ ;  $^1\text{H}$  NMR (500 MHz,  $\text{CDCl}_3$ )  $\delta$  7.71 (d,  $J = 7.3$  Hz, 2H), 7.35 (m, 2H), 7.25 (m, 1H), 7.19 (d,  $J = 8.8$  Hz, 2H), 7.09 (t,  $J = 7.8$  Hz, 2H), 6.84-6.80 (m, 3H), 6.75 (d,  $J = 7.8$  Hz, 2H), 4.71 (s, 1H), 4.66 (d,  $J = 10.4$  Hz, 1H), 4.15 (m, 1H), 3.75 (s, 3H), 3.46 (s, 3H), 2.51 (m, 2H);  $^{13}\text{C}$  NMR (125 MHz,  $\text{CDCl}_3$ )  $\delta$  172.9, 159.3, 151.9, 142.7, 130.9, 128.9, 128.6, 128.4, 128.2, 127.1, 122.0, 117.6, 113.6, 74.7, 55.4, 51.8, 44.8, 39.3; LRMS (ES): Mass calcd for  $\text{C}_{24}\text{H}_{25}\text{NO}_4$  [ $\text{M}-1$ ] $^+$ , 390. Found [ $\text{M}-1$ ] $^+$ , 390; Enantiomeric ratio was measured by HPLC (Chiralcel AD-H, 5% IPA/Hexanes, 1 mL/min,  $\text{Rt}_1 = 27.7$ ,  $\text{Rt}_2 = 40.6$ ).

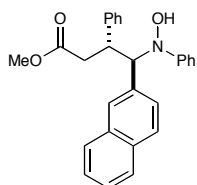

**(3R, 4R)-methyl-4-(hydroxy(phenyl)amino)-4-(naphthalene-2-yl)-3-phenylbutanoate (9):** Prepared according to general procedure using *trans*-cinnamaldehyde (25  $\mu$ L, 0.2 mmol) and (*Z*)-*N*-(naphthalene-2-ylmethylene)aniline oxide (99 mg, 0.4 mmol) to afford 57 mg (69%) of **9** as a yellow solid. Analytical data for **9**: IR (film) 3408, 3059, 3030, 2952, 2927, 1734, 1597, 1265  $\text{cm}^{-1}$ ;  $^1\text{H}$  NMR (500 MHz,  $\text{CDCl}_3$ )  $\delta$  7.78-7.69 (m, 4H), 7.52 (d,  $J = 8.3$  Hz, 1H), 7.47-7.42 (m, 4H), 7.37 (t,  $J = 7.4$  Hz, 2H), 7.28-7.26 (m, 1H), 7.05 (t,  $J = 7.8$  Hz, 2H), 6.87 (d,  $J = 7.8$  Hz, 2H), 6.76 (t,  $J = 6.8$  Hz, 1H), 4.90 (d,  $J = 10.7$  Hz, 1H), 4.84 (s, 1H), 4.32-4.27 (m, 1H), 3.41 (s, 3H), 2.53-2.51 (m, 2H);  $^{13}\text{C}$  NMR (125 MHz,  $\text{CDCl}_3$ )  $\delta$  172.8, 151.7, 142.6, 134.0, 133.3, 129.0 (x2), 128.7 (x2), 128.3 (x2), 127.8 (x2), 127.2 (x2), 126.2, 122.1 (x2), 117.6, 75.3, 51.8, 44.8, 39.3; LRMS (ES): Mass calcd for  $\text{C}_{27}\text{H}_{25}\text{NO}_3$  [ $\text{M}+1$ ] $^+$ , 412. Found [ $\text{M}+1$ ] $^+$ , 412; Enantiomeric ratio was measured by HPLC (Chiralcel AD-H, 5% IPA/Hexanes, 1 mL/min,  $\text{Rt}_1 = 27.2$ ,  $\text{Rt}_2 = 35.3$ ).

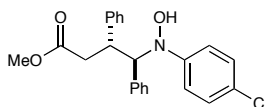

**(3R, 4R)-methyl 4-((4-chlorophenyl)(hydroxy)amino)-3,4-diphenylbutanoate (10):** Prepared according to general procedure using *trans*-cinnamaldehyde (25  $\mu$ L, 0.2 mmol) and (*Z*)-*N*-benzylidene-4-chloroaniline oxide (93 mg, 0.4 mmol) to afford 64 mg (80%) of **10** as a pale yellow solid. Analytical data for **10**: IR (film) 3409, 3037, 2951, 1733, 1488  $\text{cm}^{-1}$ ;  $^1\text{H}$  NMR (500 MHz,  $\text{CDCl}_3$ )  $\delta$  7.42-7.35 (m, 4H), 7.29-7.25 (m, 6H), 7.04 (d,  $J = 8.8$  Hz, 2H), 6.77 (d,  $J = 8.8$  Hz, 2H), 4.83 (s, 1H), 4.65 (d,  $J = 10.7$  Hz, 1H), 4.18 (m, 1H), 3.47 (s, 3H), 2.50 (d,  $J = 6.8$  Hz, 2H);  $^{13}\text{C}$  NMR (125 MHz,  $\text{CDCl}_3$ )  $\delta$  172.6, 150.3, 142.3, 135.8, 129.7, 129.0, 128.5, 128.3 (x2), 128.1, 127.8, 127.2, 118.9, 75.4, 51.8, 44.6, 39.2; LRMS (ES): Mass calcd for  $\text{C}_{23}\text{H}_{22}\text{ClNO}_3$ ,

$[M+H]^+$ , 396. Found  $[M+H]^+$ , 396; Enantiomeric ratio was measured by HPLC (Chiralcel AD-H, 5% IPA/Hexanes, 1 mL/min,  $R_{t1} = 20.8$ ,  $R_{t2} = 27.8$ ).

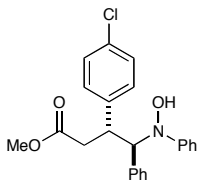

**(3R, 4R)-methyl 3-(4-chlorophenyl)-4-(hydroxy(phenyl)amino)-4-phenylbutanoate (11):** Prepared according to general procedure using (*E*)-3-(4-chlorophenyl)prop-2-enal (33 mg, 0.2 mmol) and (*Z*)-*N*-benzylideneaniline oxide (80 mg, 0.4 mmol) to afford 62 mg (78%) of **11** as a yellow solid. Analytical data for **11**: IR (film) 3417, 3061, 3030, 2952, 1734, 1595, 1490  $\text{cm}^{-1}$ ;  $^1\text{H}$  NMR (500 MHz,  $\text{CDCl}_3$ )  $\delta$  7.35 (m, 4H), 7.26 (m, 6H), 7.10 (t,  $J = 8.3$  Hz, 2H), 6.83 (d,  $J = 8.3$  Hz, 2H), 4.70 (s, 1H), 4.66 (d,  $J = 10.8$  Hz, 1H), 4.20 (td,  $J = 10.3$ , 4.9 Hz, 1H), 3.50 (s, 3H), 2.50 (m, 2H);  $^{13}\text{C}$  NMR (125 MHz,  $\text{CDCl}_3$ )  $\delta$  172.5, 151.5, 141.0, 135.6, 132.8, 129.7, 129.6, 129.1 (x2), 128.7, 128.3, 122.4, 117.7, 75.4, 51.9, 43.9, 38.9; LRMS (ES): Mass calcd for  $\text{C}_{23}\text{H}_{22}\text{ClNO}_3$   $[M+H]^+$ , 396. Found  $[M+H]^+$ , 396; Enantiomeric ratio was measured by HPLC (Chiralcel OD-H, 95:4:1 Hexanes:IPA:EtOH, 1 mL/min,  $R_{t1} = 10.8$ ,  $R_{t2} = 12.9$ ).

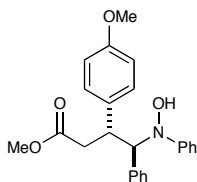

**(3R, 4R)-methyl 4-(hydroxy(phenyl)amino)-3-(4-methoxyphenyl)-4-phenylbutanoate (12):** Prepared according to general procedure using (*E*)-3-(4-methoxyphenyl)prop-2-enal (32 mg, 0.2 mmol) and (*Z*)-*N*-benzylideneaniline oxide (80 mg, 0.4 mmol) to afford 56 mg (72%) of **12** as a yellow solid. Analytical data for **12**: IR (film) 3422, 3113, 2953, 2837, 1732, 1512, 1250  $\text{cm}^{-1}$ ;  $^1\text{H}$  NMR (500 MHz,  $\text{CDCl}_3$ )  $\delta$  7.32 (d,  $J = 8.8$  Hz, 2H), 7.28-7.25 (m, 2H), 7.21 (d,  $J = 5.4$  Hz, 3H), 7.08 (t,  $J = 7.8$  Hz, 2H), 6.89 (d,  $J = 8.3$  Hz, 2H), 6.84 (d,  $J = 7.8$  Hz, 2H), 6.80 (t,  $J = 7.3$  Hz, 1H), 4.76 (s, 1H), 4.76 (d,  $J = 10.7$  Hz, 1H), 4.13 (td,  $J = 9.8$ , 5.4 Hz, 1H), 3.80 (s, 3H), 3.47 (s, 3H), 2.48-2.45 (m, 2H);  $^{13}\text{C}$  NMR (125 MHz,  $\text{CDCl}_3$ )  $\delta$  172.8, 158.6, 151.6, 136.2, 134.3, 129.7, 129.0, 128.5, 128.2 (x2), 122.0, 117.5, 114.3, 75.2, 55.4, 51.8, 43.8, 39.3; LRMS (ES): Mass calcd for  $\text{C}_{24}\text{H}_{25}\text{NO}_4$   $[M]^+$ , 391. Found  $[M]^+$ , 391; Enantiomeric ratio was measured by HPLC (Chiralcel OD-H, 95:4:1 Hexanes:IPA:EtOH, 1 mL/min,  $R_{t1} = 12.8$ ,  $R_{t2} = 16.6$ ).

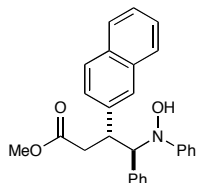

**(3R, 4R)-methyl 4-(hydroxy(phenyl)amino)-3-(naphthalen-2-yl)-4-phenylbutanoate (13):** Prepared according to general procedure using (*E*)-3-(naphthalen-2-yl)prop-2-enal (36 mg, 0.2 mmol) and (*Z*)-*N*-benzylideneaniline oxide (80 mg, 0.4 mmol) to afford 60 mg (73%) of **13** as a yellow solid. Analytical data for **13**: IR (film) 3415, 3057, 2952, 1732, 1597, 1265  $\text{cm}^{-1}$ ;  $^1\text{H}$  NMR (500 MHz,  $\text{CDCl}_3$ )  $\delta$  7.90-7.83 (m, 4H), 7.60 (d,  $J = 8.4$  Hz, 1H), 7.48 (m, 2H), 7.34 (m,

2H), 7.26-7.23 (m, 3H), 7.08 (t,  $J = 7.5$  Hz, 2H), 6.84 (d,  $J = 7.8$  Hz, 2H), 6.80 (t,  $J = 7.3$  Hz, 1H), 4.84 (d,  $J = 10.8$  Hz, 1H), 4.79 (s, 1H), 4.39 (m, 1H), 3.44 (s, 3H), 2.62-2.57 (m, 2H);  $^{13}\text{C}$  NMR (125 MHz,  $\text{CDCl}_3$ )  $\delta$  172.7, 151.6, 140.1, 136.0, 133.9, 132.9, 130.2, 129.8, 128.7, 128.6, 128.3, 128.2, 127.9, 127.3, 126.3, 125.9, 122.1, 117.6, 75.2, 51.8, 44.9, 39.1; LRMS (ES): Mass calcd for  $\text{C}_{27}\text{H}_{25}\text{NO}_3$   $[\text{M}+1]^+$ , 412.2. Found  $[\text{M}+1]^+$ , 412.0; Enantiomeric ratio was measured by HPLC (Chiralcel OD-H, 95:4:1 Hexanes:IPA:EtOH, 0.25 mL/min,  $\text{Rt}_1 = 49.6$ ,  $\text{Rt}_2 = 54.3$ ).

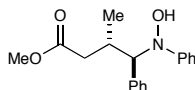

**(3S, 4R)-methyl 4-(hydroxy(phenyl)amino)-3-methyl-4-phenylbutanoate (14):** Prepared with DBU (6.6  $\mu\text{L}$ , 0.04 mmol) instead of  $\text{Et}_3\text{N}$  using *trans*-crotonaldehyde (17  $\mu\text{L}$ , 0.2 mmol) and (*Z*)-*N*-benzylideneaniline oxide (80 mg, 0.4 mmol) to afford 43 mg (72%) of **14** as a yellow solid. Analytical data for **14**: IR (film) 3442, 3062, 2952, 1735, 1437, 1174  $\text{cm}^{-1}$ ;  $^1\text{H}$  NMR (500 MHz,  $\text{CDCl}_3$ )  $\delta$  7.19-7.15 (m, 7H), 6.98 (d,  $J = 7.8$  Hz, 2H), 6.89 (t,  $J = 7.4$  Hz, 1H), 4.99 (s, 1H), 4.21 (d,  $J = 9.8$  Hz, 1H), 3.64 (s, 3H), 3.03 (m, 1H), 2.31 (dd,  $J = 15.7, 4.4$  Hz, 1H), 2.01 (dd,  $J = 15.6, 8.8$  Hz, 1H), 1.25 (d,  $J = 6.4$  Hz, 3H);  $^{13}\text{C}$  NMR (125 MHz,  $\text{CDCl}_3$ )  $\delta$  174.0, 152.1, 136.2, 129.8, 128.7, 128.1, 127.9, 122.4, 118.2, 76.1, 51.9, 38.8, 32.1, 18.4; LRMS (ES): Mass calcd for  $\text{C}_{18}\text{H}_{21}\text{NO}_3$   $[\text{M}+\text{H}]^+$ , 298. Found  $[\text{M}+\text{H}]^+$ , 298. Enantiomeric ratio was measured by HPLC (Chiralcel AD-H, 5% IPA/Hexanes, 1 mL/min,  $\text{Rt}_1 = 14.0$ ,  $\text{Rt}_2 = 17.7$ ).

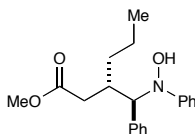

**(S)-methyl 3-((R)-(hydroxy(phenyl)amino)(phenyl)methyl)hexanoate (15):** Prepared with DBU (6.6  $\mu\text{L}$ , 0.04 mmol) instead of  $\text{Et}_3\text{N}$  using *trans*-2-hexen-1-al (23  $\mu\text{L}$ , 0.2 mmol) and (*Z*)-*N*-benzylideneaniline oxide (80 mg, 0.4 mmol) to afford 41 mg (64%) of **15** as a yellow solid. Analytical data for **15**: IR (film) 3441, 3061, 3029, 2957, 2870, 1717, 1595, 1168  $\text{cm}^{-1}$ ;  $^1\text{H}$  NMR (500 MHz,  $\text{CDCl}_3$ )  $\delta$  7.18-7.14 (m 7H), 6.99 (d,  $J = 7.8$  Hz, 2H), 6.90 (t,  $J = 7.3$  Hz, 1H), 5.20 (s, 1H), 4.42 (d,  $J = 8.8$  Hz, 1H), 3.64 (s, 3H), 2.96 (bs, 1H), 2.33 (dd,  $J = 15.7, 5.4$  Hz, 1H), 2.14 (dd,  $J = 15.6, 6.8$  Hz, 1H), 1.73 (m, 1H), 1.51-1.44 (m, 3H), 0.96 (t,  $J = 6.3$  Hz, 3H);  $^{13}\text{C}$  NMR (125 MHz,  $\text{CDCl}_3$ )  $\delta$  174.5, 151.8, 136.3, 129.9, 128.7, 128.0, 127.8, 122.9, 119.0, 74.1, 51.9, 36.6, 35.6, 34.1, 20.0, 14.9; LRMS (ES): Mass calcd for  $\text{C}_{20}\text{H}_{25}\text{NO}_3$   $[\text{M}-\text{H}]^+$ , 326. Found  $[\text{M}-\text{H}]^+$ , 326. Enantiomeric ratio was measured by HPLC (Chiralcel AD-H, 5% IPA/Hexanes, 1 mL/min,  $\text{Rt}_1 = 16.6$ ,  $\text{Rt}_2 = 20.6$ ).

**Procedure for Synthesis of  $\gamma$ -Lactam**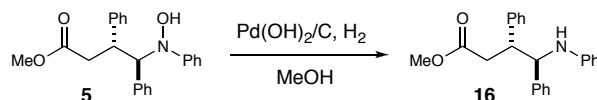

To a flame dried 10 mL round bottom flask equipped with magnetic stirring bar was added **5** (35 mg, 0.1 mmol). The solid was diluted with MeOH (1 mL, 0.1 M). The flask was purged with nitrogen gas. Pd(OH)<sub>2</sub>/C (5 mol %) was then added and the flask was purged with nitrogen for a second time. The flask was purged with hydrogen using a balloon and the reaction was then stirred under the hydrogen atmosphere for 30 min. The reaction mixture was then filtered through Celite with CH<sub>2</sub>Cl<sub>2</sub> as an eluent and concentrated to afford 29 mg (82%) of **16** as a pale yellow solid. Spectroscopic data for **16** matched previously reported.<sup>4</sup> Compound **16** was judged by NMR spectroscopy to be >95% pure and thus used without further purification in the lactam forming reaction.

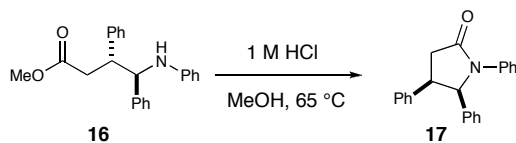

To a 10 mL round bottom flask equipped with magnetic stirring bar was added **16** (35 mg, 0.1 mmol). The solid was diluted with MeOH (1 mL, 0.1 M) and 1 M HCl (1 mL). The reaction was heated to 65 °C for 24 hours. The reaction was cooled to 23 °C and was diluted with diethyl ether and poured into a separatory funnel. The organic layer was washed with water and separated. The aqueous layer was extracted 2x with diethyl ether. The combined organic layers were dried over anhydrous MgSO<sub>4</sub>, filtered, and concentrated to afford 28 mg (88%) of lactam **17** which was judge to be pure by NMR spectroscopy. All spectroscopic data (1H and 13C NMR spectroscopy, mass spectrometry) for this lactam (**17**) matched previously reported.<sup>5</sup>

4. Alonso, E.; Ramon, D. J.; Yus, M. *Tetrahedron* **1997**, 53, 2641-2652.

5. Katritzky, A. R.; Feng, D. M.; Lang, H. Y. *J. Org. Chem.* **1997**, 62, 706-714.

## Selected NMR Spectra

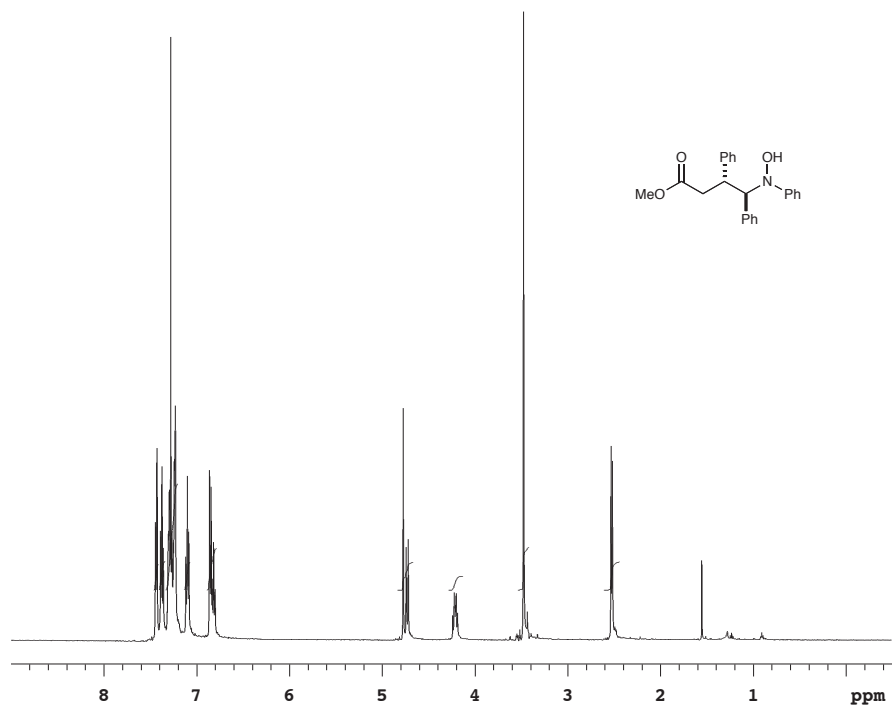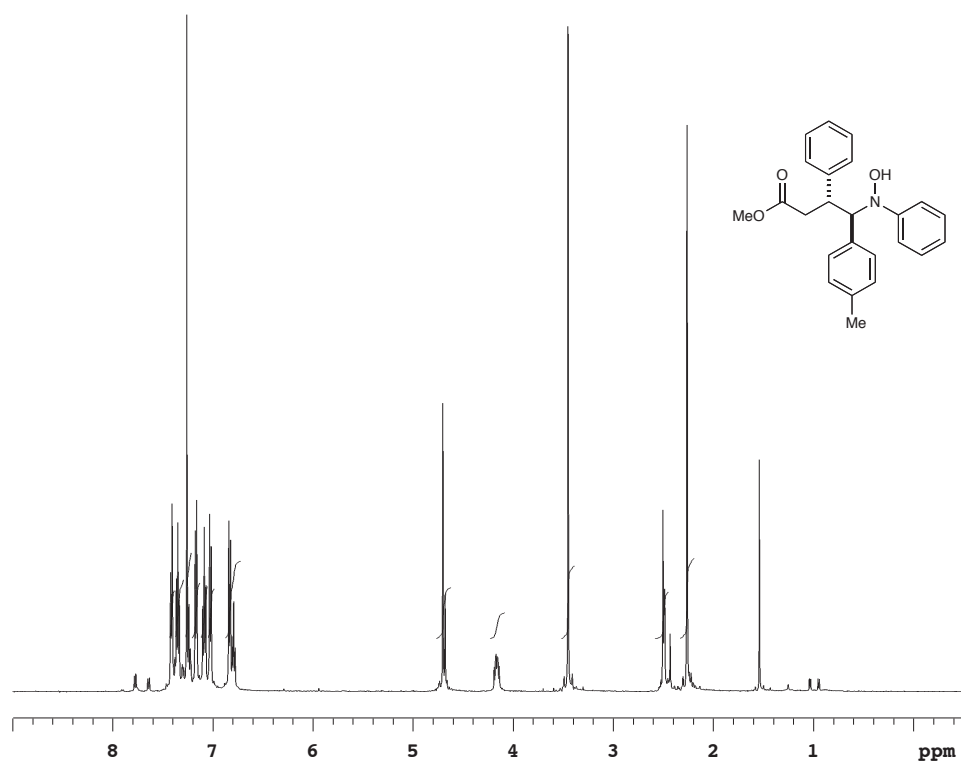



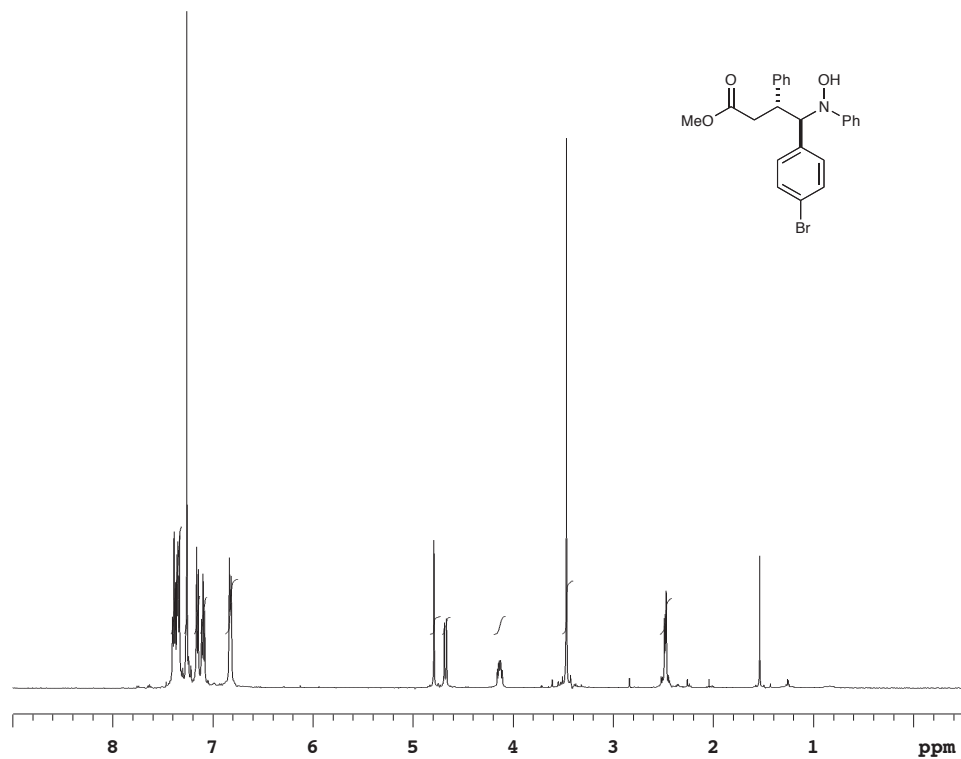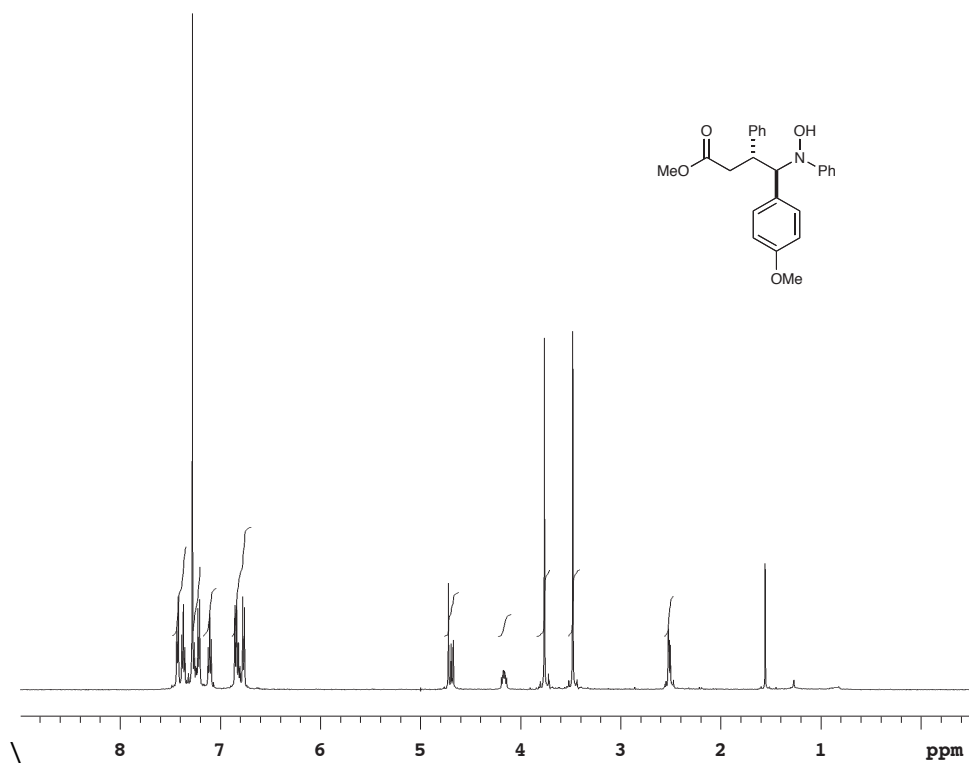

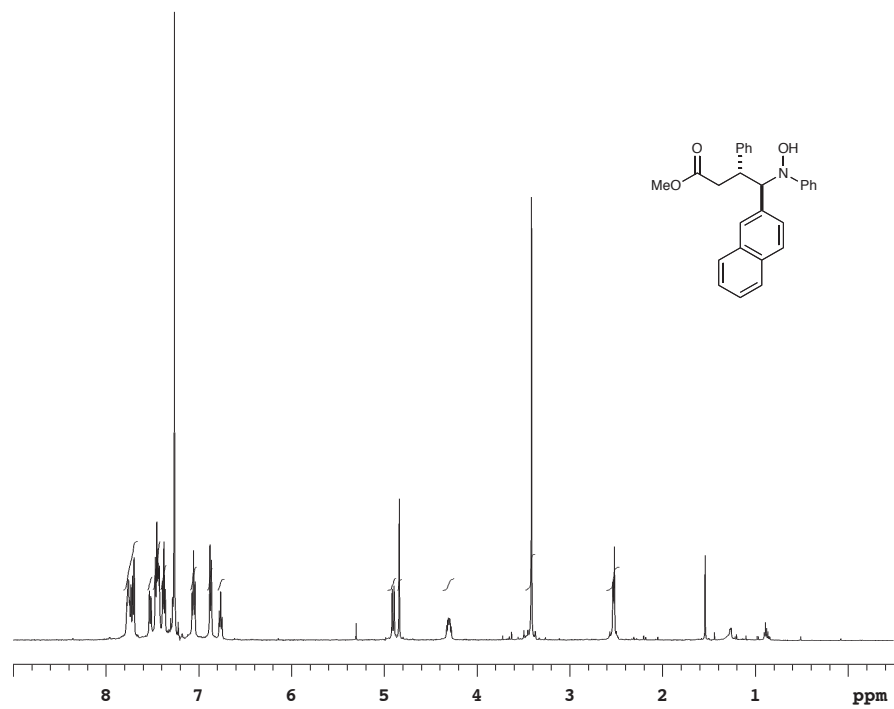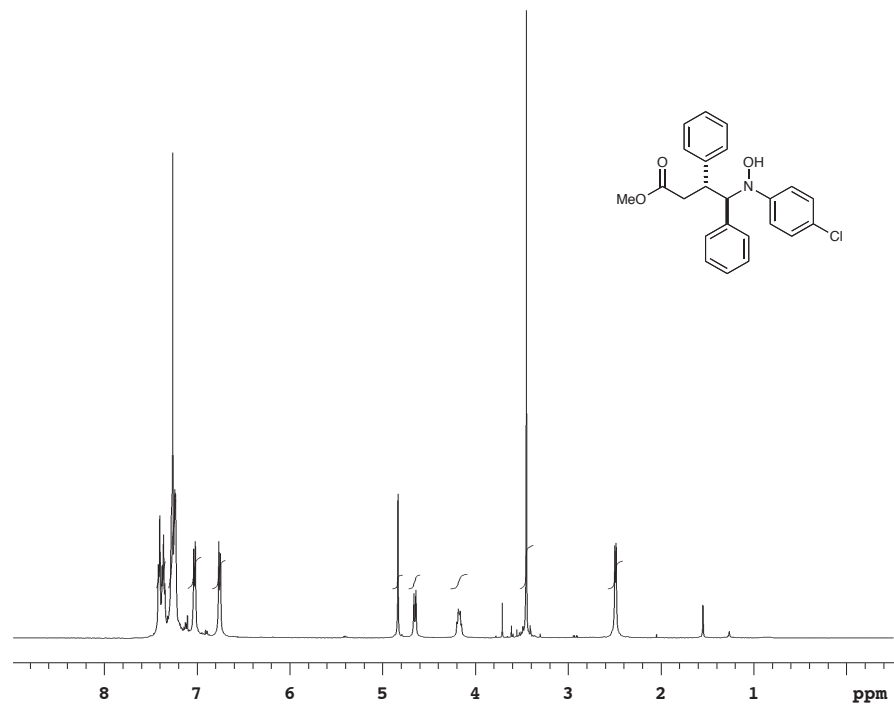

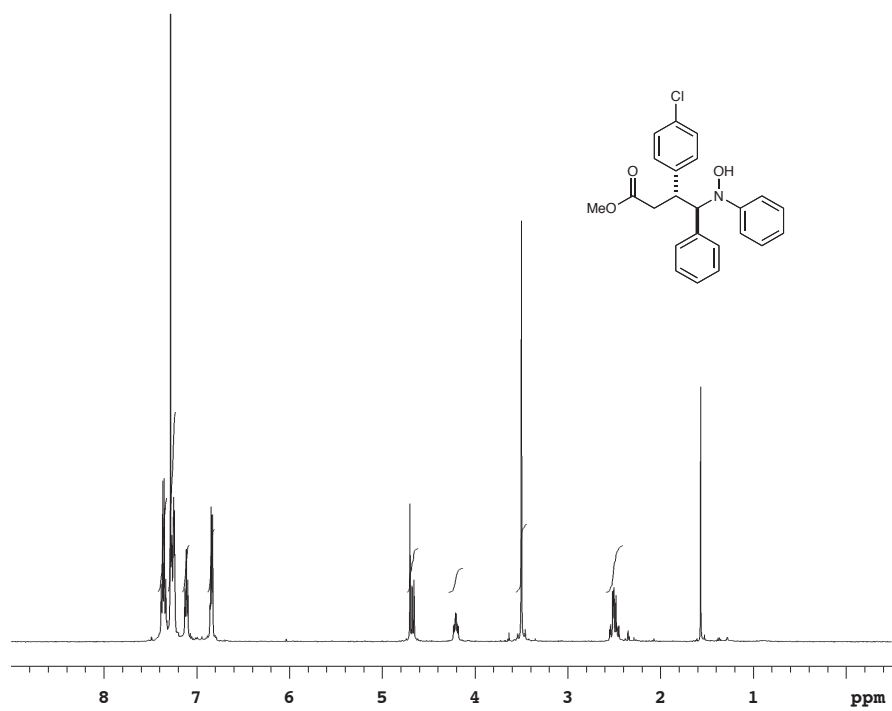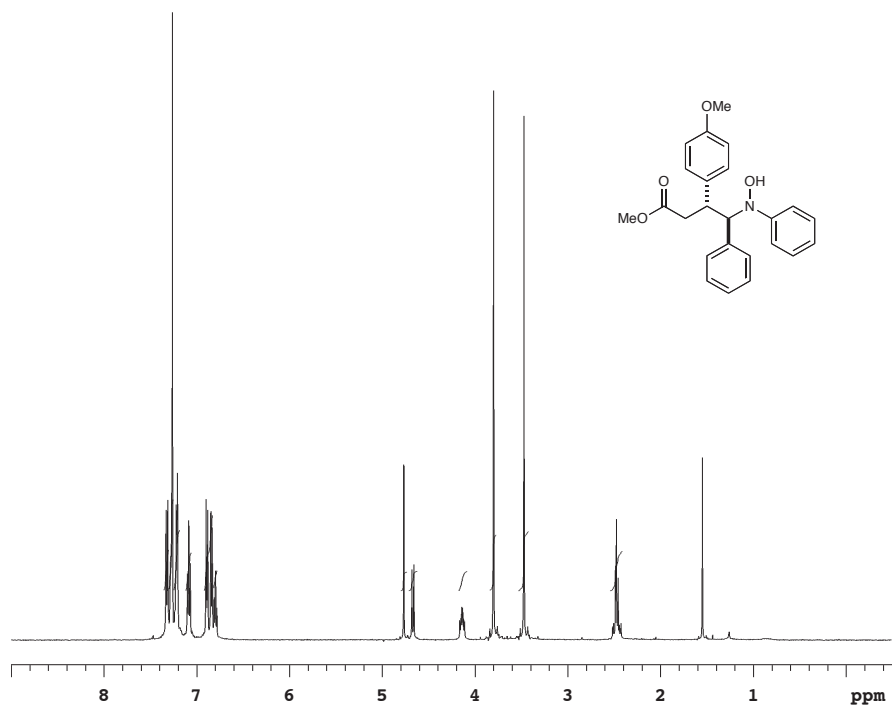

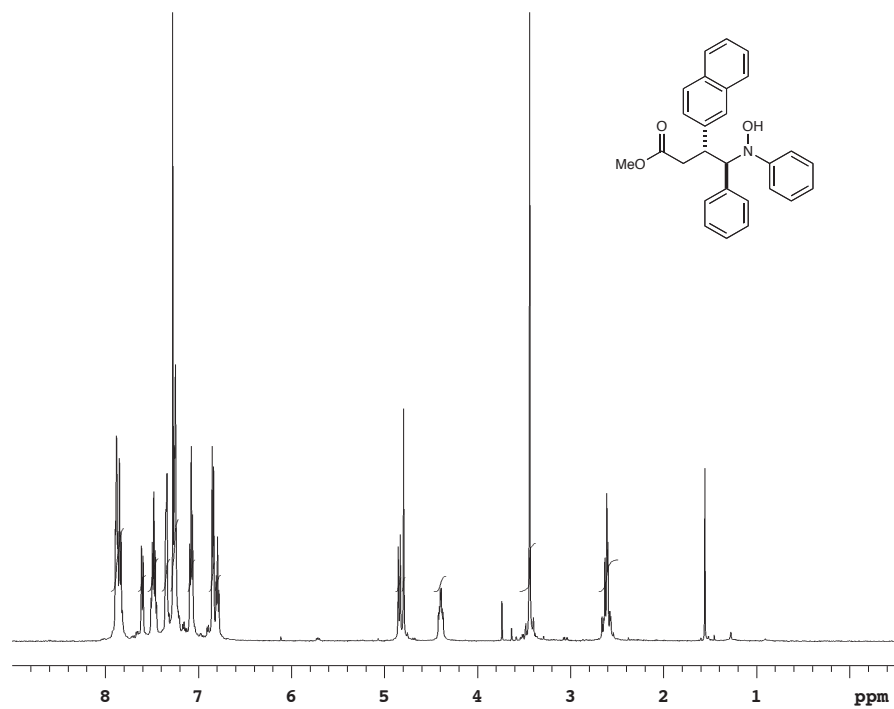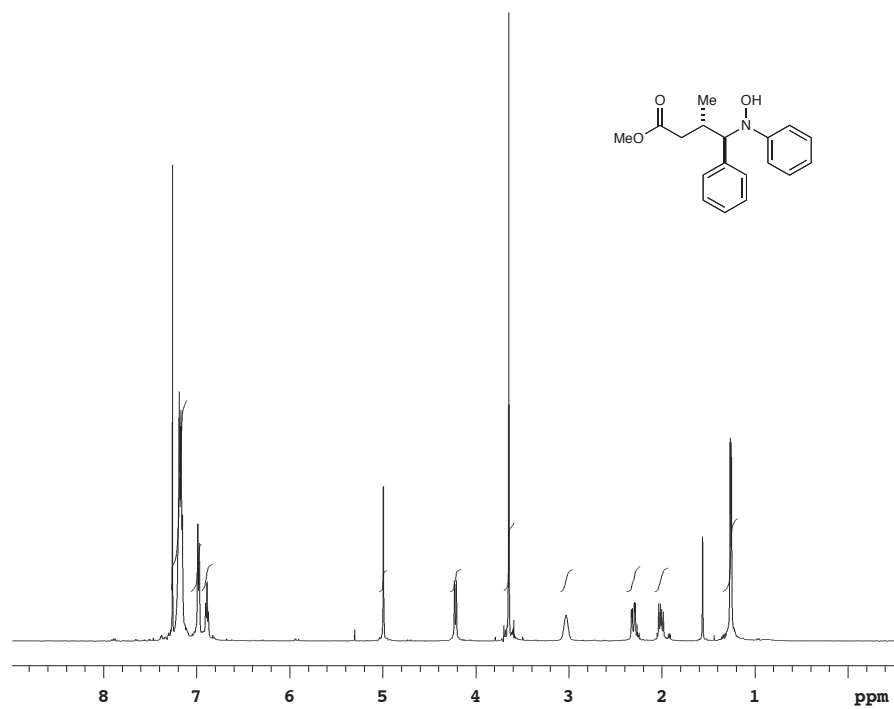

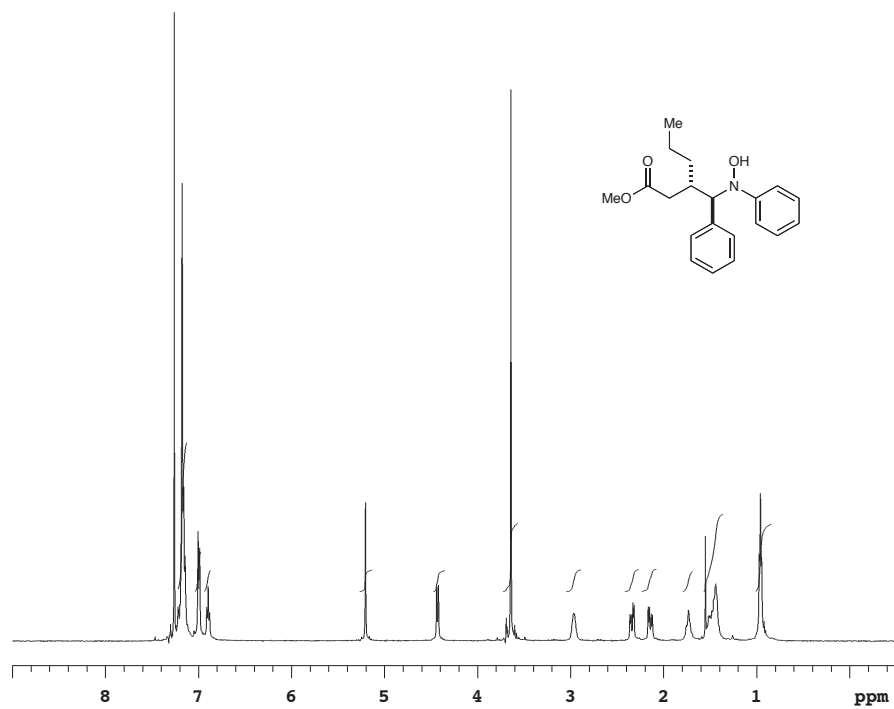

## HPLC Traces of Racemic and Enantioenriched Compounds

### Racemic 5

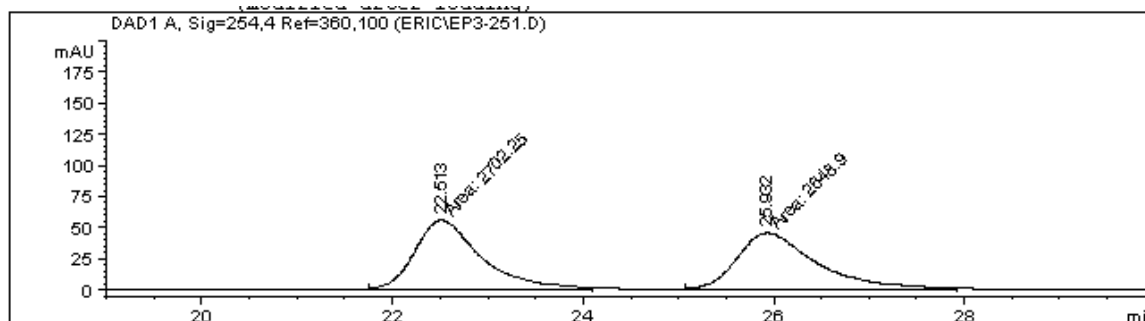

=====  
 Area Percent Report  
 =====

Sorted By : Signal  
 Multiplier : 1.0000  
 Dilution : 1.0000  
 Use Multiplier & Dilution Factor with ISTDs

Signal 1: DAD1 A, Sig=254,4 Ref=360,100

| Peak # | RetTime [min] | Type | Width [min] | Area [mAU*s] | Height [mAU] | Area %  |
|--------|---------------|------|-------------|--------------|--------------|---------|
| 1      | 22.513        | MM   | 0.8119      | 2702.24854   | 55.47131     | 50.4985 |
| 2      | 25.932        | MM   | 0.9774      | 2648.89551   | 45.16974     | 49.5015 |

### Enantioenriched 5

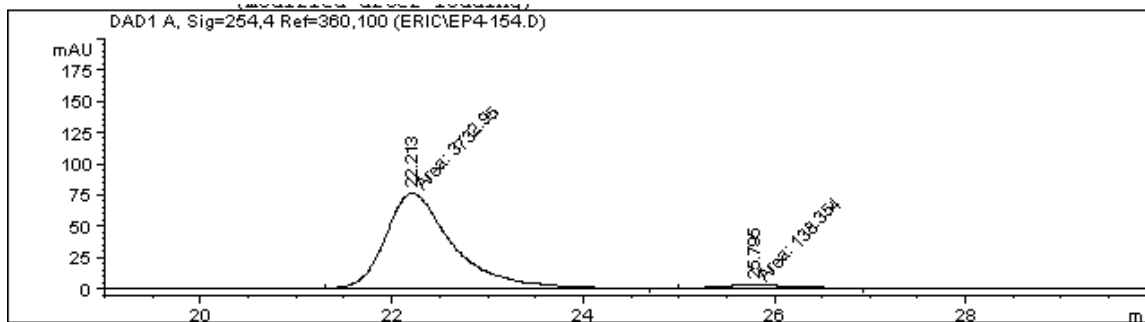

=====  
 Area Percent Report  
 =====

Sorted By : Signal  
 Multiplier : 1.0000  
 Dilution : 1.0000  
 Use Multiplier & Dilution Factor with ISTDs

Signal 1: DAD1 A, Sig=254,4 Ref=360,100

| Peak # | RetTime [min] | Type | Width [min] | Area [mAU*s] | Height [mAU] | Area %  |
|--------|---------------|------|-------------|--------------|--------------|---------|
| 1      | 22.213        | MM   | 0.8158      | 3732.95435   | 76.26228     | 96.4262 |
| 2      | 25.795        | MM   | 0.9413      | 138.35440    | 2.44983      | 3.5738  |

**Racemic 6**

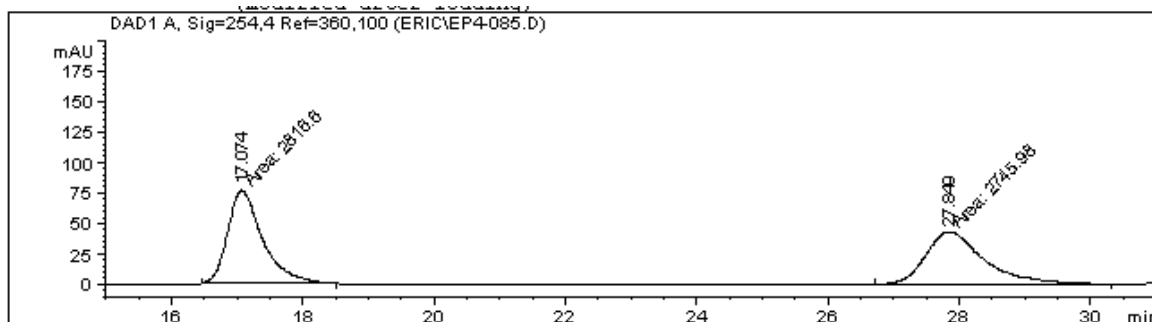

=====  
 Area Percent Report  
 =====

Sorted By : Signal  
 Multiplier : 1.0000  
 Dilution : 1.0000  
 Use Multiplier & Dilution Factor with ISTDs

Signal 1: DAD1 A, Sig=254,4 Ref=360,100

| Peak # | RetTime [min] | Type | Width [min] | Area [mAU*s] | Height [mAU] | Area %  |
|--------|---------------|------|-------------|--------------|--------------|---------|
| 1      | 17.074        | MM   | 0.6148      | 2816.60083   | 76.35253     | 50.6348 |
| 2      | 27.849        | MM   | 1.0579      | 2745.97705   | 43.26215     | 49.3652 |

**Enantioenriched 6**

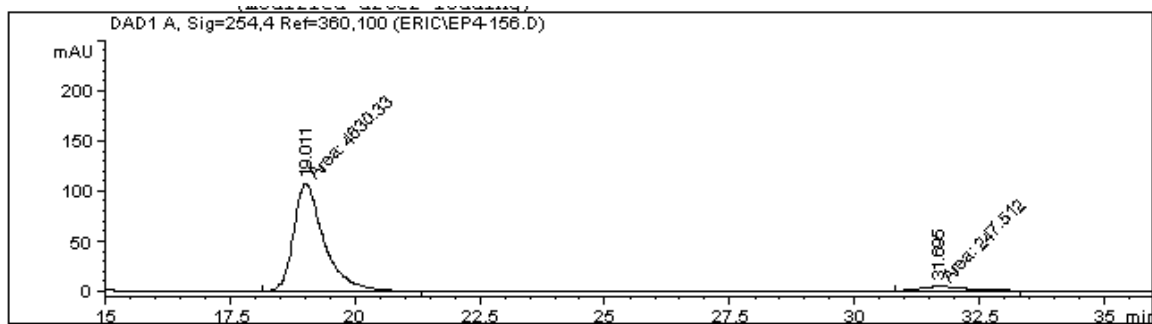

=====  
 Area Percent Report  
 =====

Sorted By : Signal  
 Multiplier : 1.0000  
 Dilution : 1.0000  
 Use Multiplier & Dilution Factor with ISTDs

Signal 1: DAD1 A, Sig=254,4 Ref=360,100

| Peak # | RetTime [min] | Type | Width [min] | Area [mAU*s] | Height [mAU] | Area %  |
|--------|---------------|------|-------------|--------------|--------------|---------|
| 1      | 19.011        | MM   | 0.7165      | 4630.33301   | 107.70879    | 94.9258 |
| 2      | 31.695        | MM   | 1.0948      | 247.51207    | 3.76792      | 5.0742  |

**Racemic 7**

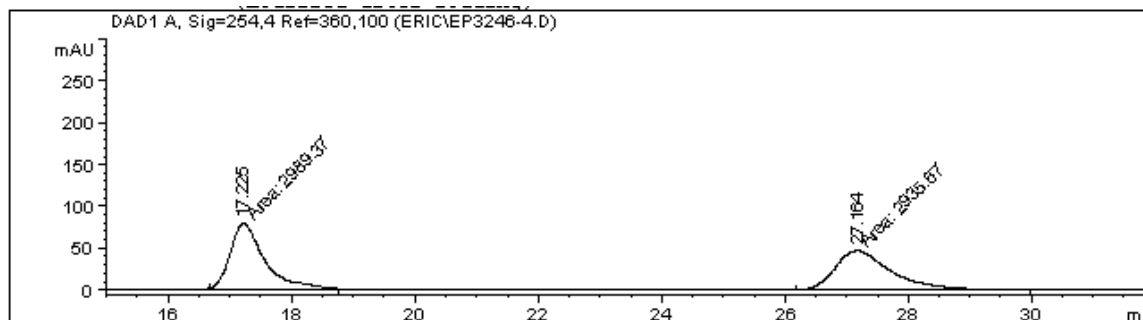

=====  
 Area Percent Report  
 =====

Sorted By : Signal  
 Multiplier : 1.0000  
 Dilution : 1.0000  
 Use Multiplier & Dilution Factor with ISTDs

Signal 1: DAD1 A, Sig=254,4 Ref=360,100

| Peak # | RetTime [min] | Type | Width [min] | Area [mAU*s] | Height [mAU] | Area %  |
|--------|---------------|------|-------------|--------------|--------------|---------|
| 1      | 17.225        | MM   | 0.6451      | 2989.36865   | 77.23407     | 50.4532 |
| 2      | 27.164        | MM   | 1.0591      | 2935.66797   | 46.19893     | 49.5468 |

**Enantioenriched 7**

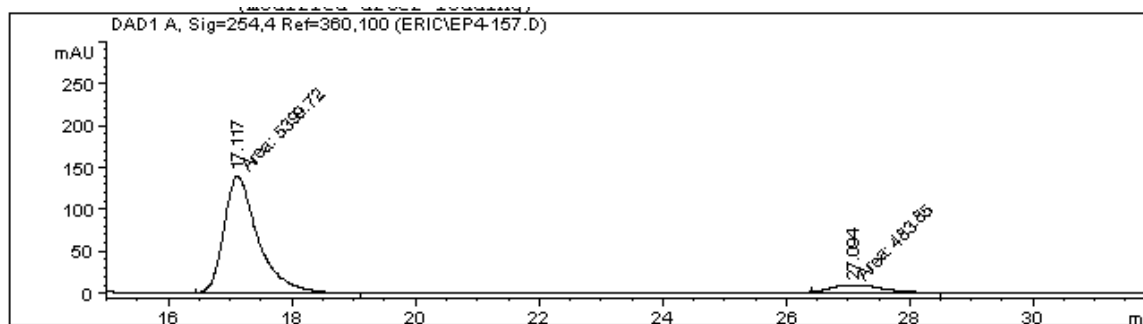

=====  
 Area Percent Report  
 =====

Sorted By : Signal  
 Multiplier : 1.0000  
 Dilution : 1.0000  
 Use Multiplier & Dilution Factor with ISTDs

Signal 1: DAD1 A, Sig=254,4 Ref=360,100

| Peak # | RetTime [min] | Type | Width [min] | Area [mAU*s] | Height [mAU] | Area %  |
|--------|---------------|------|-------------|--------------|--------------|---------|
| 1      | 17.117        | MM   | 0.6429      | 5399.71631   | 139.98798    | 91.7762 |
| 2      | 27.094        | MM   | 0.8929      | 483.85028    | 9.03124      | 8.2238  |



**Racemic 8**

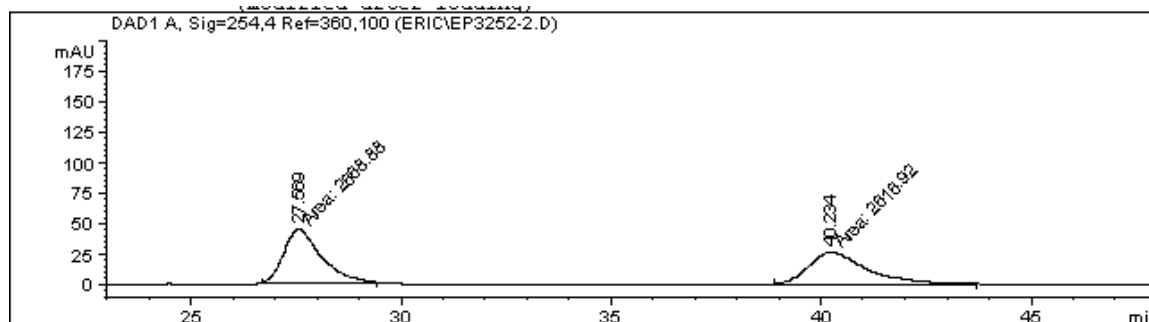

=====  
 Area Percent Report  
 =====

Sorted By : Signal  
 Multiplier : 1.0000  
 Dilution : 1.0000  
 Use Multiplier & Dilution Factor with ISTDs

Signal 1: DAD1 A, Sig=254,4 Ref=360,100

| Peak # | RetTime [min] | Type | Width [min] | Area [mAU*s] | Height [mAU] | Area %  |
|--------|---------------|------|-------------|--------------|--------------|---------|
| 1      | 27.569        | MM   | 1.0193      | 2668.88208   | 43.63824     | 50.4915 |
| 2      | 40.234        | MM   | 1.6582      | 2616.91870   | 26.30255     | 49.5085 |

**Enantioenriched 8**

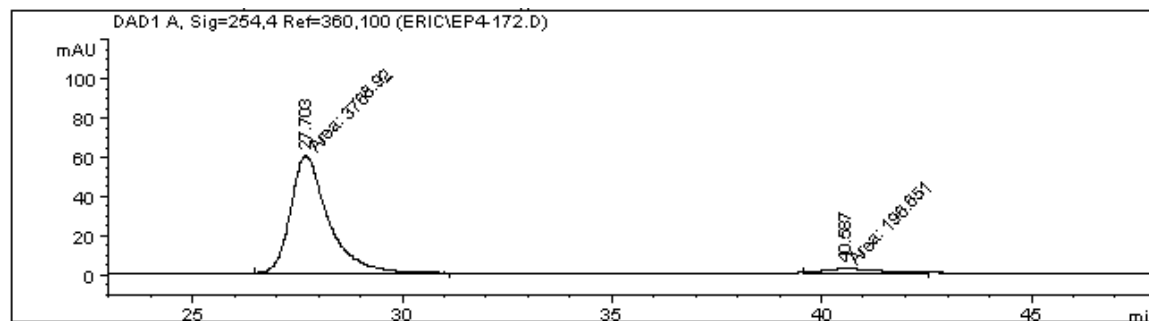

=====  
 Area Percent Report  
 =====

Sorted By : Signal  
 Multiplier : 1.0000  
 Dilution : 1.0000  
 Use Multiplier & Dilution Factor with ISTDs

Signal 1: DAD1 A, Sig=254,4 Ref=360,100

| Peak # | RetTime [min] | Type | Width [min] | Area [mAU*s] | Height [mAU] | Area %  |
|--------|---------------|------|-------------|--------------|--------------|---------|
| 1      | 27.703        | MM   | 1.0520      | 3768.91772   | 59.71017     | 95.0410 |
| 2      | 40.587        | MM   | 1.5997      | 196.65140    | 2.04883      | 4.9590  |

**Racemic 9**

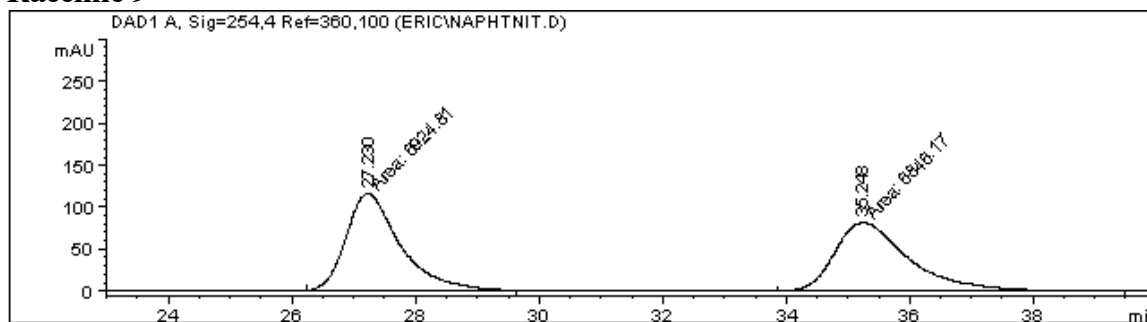

=====  
 Area Percent Report  
 =====

Sorted By : Signal  
 Multiplier : 1.0000  
 Dilution : 1.0000  
 Use Multiplier & Dilution Factor with ISTDs

Signal 1: DAD1 A, Sig=254,4 Ref=360,100

| Peak # | RetTime [min] | Type | Width [min] | Area [mAU*s] | Height [mAU] | Area %  |
|--------|---------------|------|-------------|--------------|--------------|---------|
| 1      | 27.230        | MM   | 1.0065      | 6924.81152   | 114.66558    | 50.2855 |
| 2      | 35.248        | MM   | 1.3962      | 6846.16553   | 81.72227     | 49.7145 |

**Enantioenriched 9**

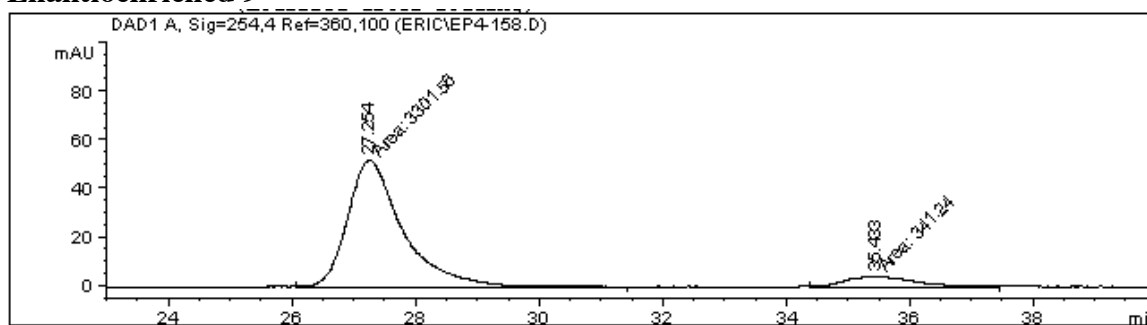

=====  
 Area Percent Report  
 =====

Sorted By : Signal  
 Multiplier : 1.0000  
 Dilution : 1.0000  
 Use Multiplier & Dilution Factor with ISTDs

Signal 1: DAD1 A, Sig=254,4 Ref=360,100

| Peak # | RetTime [min] | Type | Width [min] | Area [mAU*s] | Height [mAU] | Area %  |
|--------|---------------|------|-------------|--------------|--------------|---------|
| 1      | 27.254        | MM   | 1.0575      | 3301.56079   | 52.03489     | 90.6325 |
| 2      | 35.433        | MM   | 1.2843      | 341.24017    | 4.42826      | 9.3675  |

**Racemic 10**

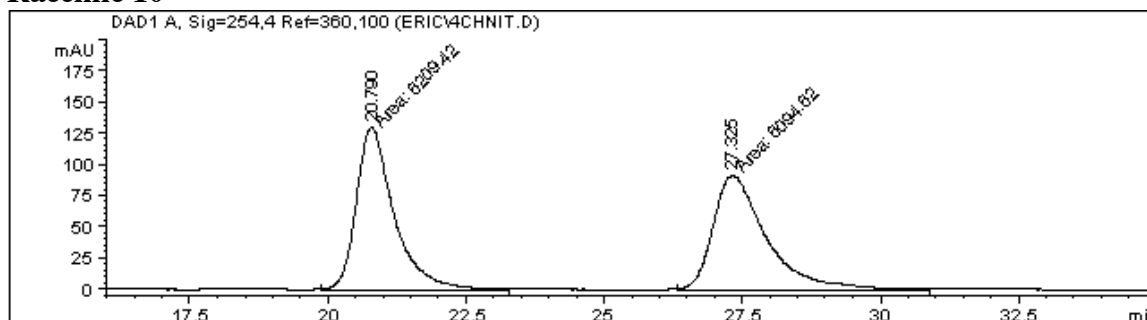

=====  
 Area Percent Report  
 =====

Sorted By : Signal  
 Multiplier : 1.0000  
 Dilution : 1.0000  
 Use Multiplier & Dilution Factor with ISTDs

Signal 1: DAD1 A, Sig=254,4 Ref=360,100

| Peak # | RetTime [min] | Type | Width [min] | Area [mAU*s] | Height [mAU] | Area %  |
|--------|---------------|------|-------------|--------------|--------------|---------|
| 1      | 20.790        | MM   | 0.7944      | 6209.42236   | 130.27071    | 50.4665 |
| 2      | 27.325        | MM   | 1.1132      | 6094.61914   | 91.25045     | 49.5335 |

**Enantioenriched 10**

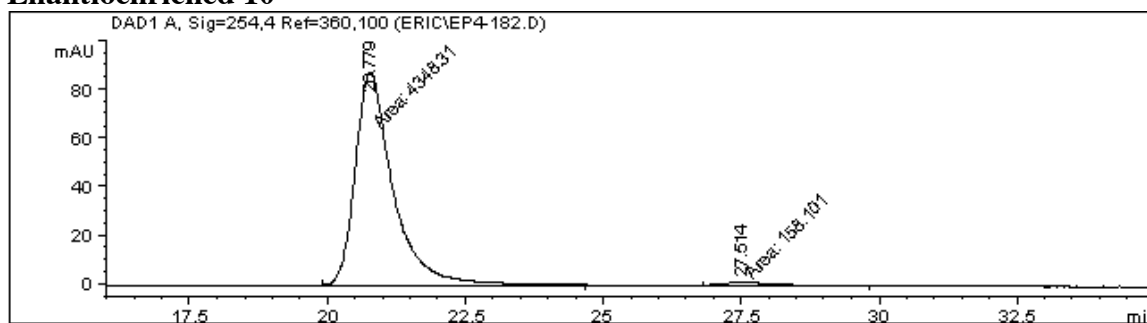

=====  
 Area Percent Report  
 =====

Sorted By : Signal  
 Multiplier : 1.0000  
 Dilution : 1.0000  
 Use Multiplier & Dilution Factor with ISTDs

Signal 1: DAD1 A, Sig=254,4 Ref=360,100

| Peak # | RetTime [min] | Type | Width [min] | Area [mAU*s] | Height [mAU] | Area %  |
|--------|---------------|------|-------------|--------------|--------------|---------|
| 1      | 20.779        | MM   | 0.8245      | 4348.31152   | 87.89635     | 96.4916 |
| 2      | 27.514        | MM   | 1.3539      | 158.10110    | 1.94631      | 3.5084  |

**Racemic 11**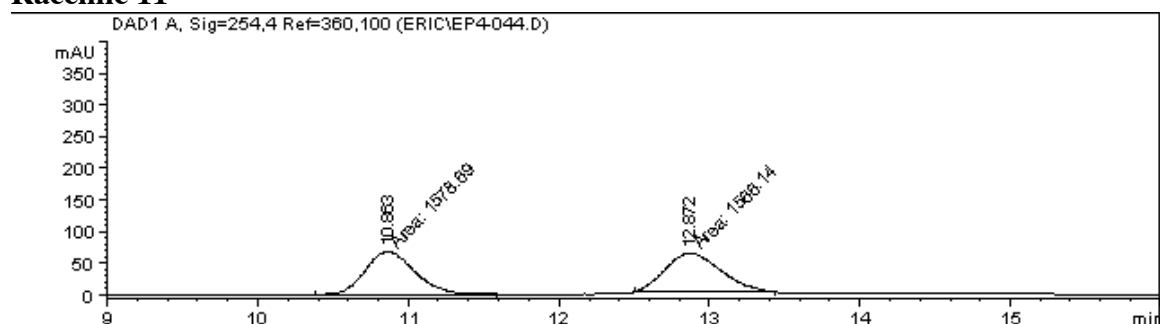

```

=====
                          Area Percent Report
=====

```

```

Sorted By      :      Signal
Multiplier     :      1.0000
Dilution      :      1.0000
Use Multiplier & Dilution Factor with ISTDs

```

Signal 1: DAD1 A, Sig=254,4 Ref=360,100

| Peak # | RetTime [min] | Type | Width [min] | Area [mAU*s] | Height [mAU] | Area %  |
|--------|---------------|------|-------------|--------------|--------------|---------|
| 1      | 10.863        | MM   | 0.3875      | 1578.69165   | 67.89874     | 50.1996 |
| 2      | 12.872        | MM   | 0.4313      | 1566.14038   | 60.52247     | 49.8004 |

**Enantioenriched 11**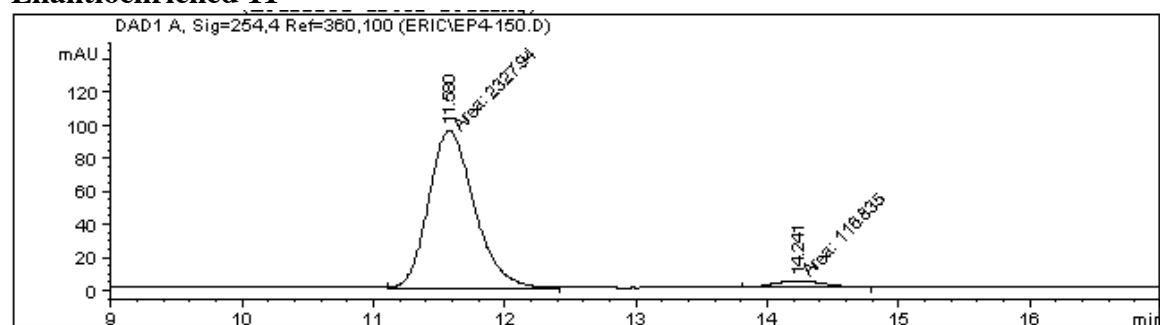

```

=====
                          Area Percent Report
=====

```

```

Sorted By      :      Signal
Multiplier     :      1.0000
Dilution      :      1.0000
Use Multiplier & Dilution Factor with ISTDs

```

Signal 1: DAD1 A, Sig=254,4 Ref=360,100

| Peak # | RetTime [min] | Type | Width [min] | Area [mAU*s] | Height [mAU] | Area %  |
|--------|---------------|------|-------------|--------------|--------------|---------|
| 1      | 11.580        | MM   | 0.4067      | 2327.94165   | 95.41018     | 95.2210 |
| 2      | 14.241        | MM   | 0.4849      | 116.83501    | 4.01568      | 4.7790  |

**Racemic 12**

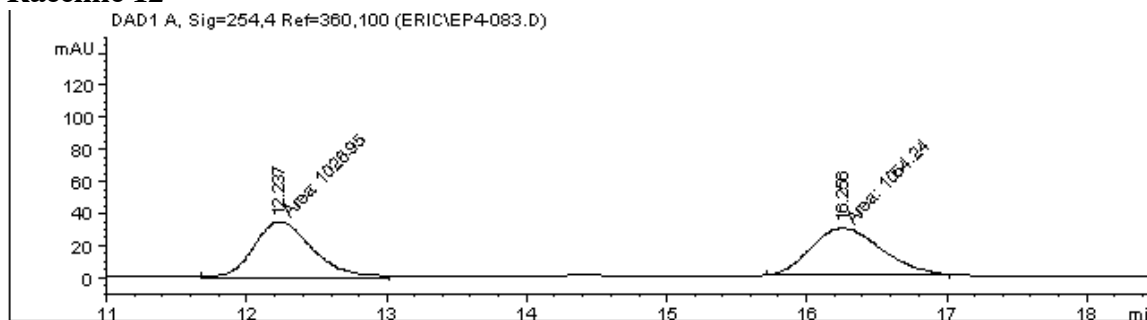

=====  
 Area Percent Report  
 =====

Sorted By : Signal  
 Multiplier : 1.0000  
 Dilution : 1.0000  
 Use Multiplier & Dilution Factor with ISTDs

Signal 1: DAD1 A, Sig=254,4 Ref=360,100

| Peak # | RetTime [min] | Type | Width [min] | Area [mAU*s] | Height [mAU] | Area %  |
|--------|---------------|------|-------------|--------------|--------------|---------|
| 1      | 12.237        | MM   | 0.4858      | 1026.95142   | 35.23169     | 49.3443 |
| 2      | 16.256        | MM   | 0.5921      | 1054.24219   | 29.67536     | 50.6557 |

**Enantioenriched 12**

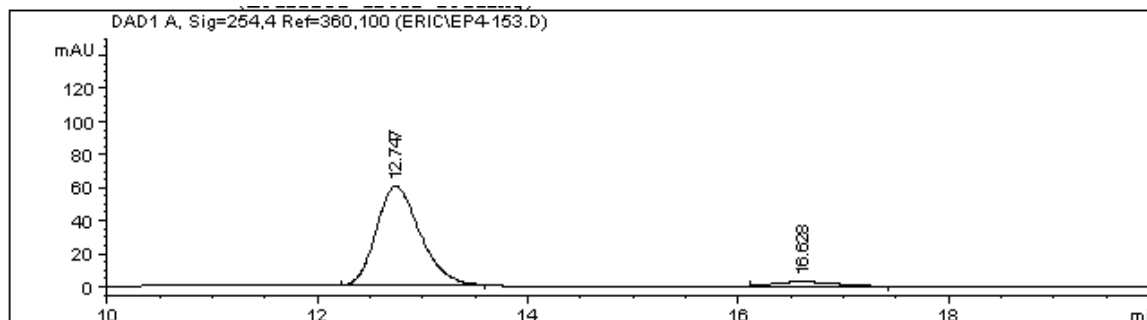

=====  
 Area Percent Report  
 =====

Sorted By : Signal  
 Multiplier : 1.0000  
 Dilution : 1.0000  
 Use Multiplier & Dilution Factor with ISTDs

Signal 1: DAD1 A, Sig=254,4 Ref=360,100

| Peak # | RetTime [min] | Type | Width [min] | Area [mAU*s] | Height [mAU] | Area %  |
|--------|---------------|------|-------------|--------------|--------------|---------|
| 1      | 12.747        | BB   | 0.4459      | 1750.41040   | 60.07641     | 94.5692 |
| 2      | 16.628        | BB   | 0.4242      | 100.52006    | 2.84517      | 5.4308  |

Totals : 1850.93046 62.92158

**Racemic 13**

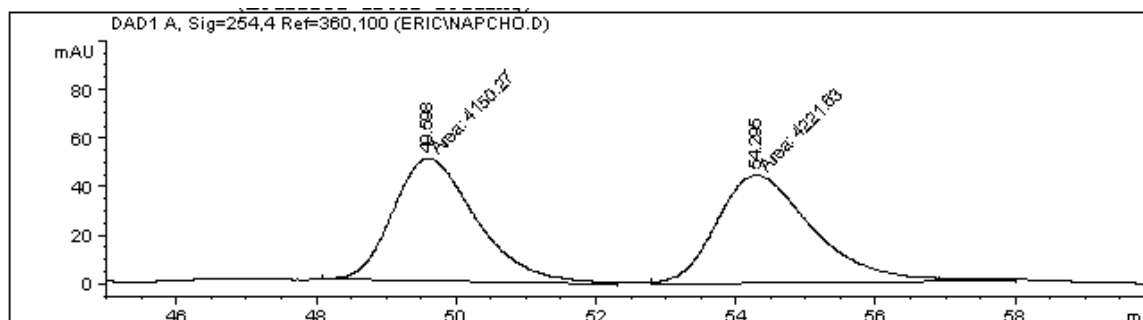

=====  
 Area Percent Report  
 =====

Sorted By : Signal  
 Multiplier : 1.0000  
 Dilution : 1.0000  
 Use Multiplier & Dilution Factor with ISTDs

Signal 1: DAD1 A, Sig=254,4 Ref=360,100

| Peak # | RetTime [min] | Type | Width [min] | Area [mAU*s] | Height [mAU] | Area %  |
|--------|---------------|------|-------------|--------------|--------------|---------|
| 1      | 49.598        | MM   | 1.3774      | 4150.26758   | 50.22043     | 49.5738 |
| 2      | 54.295        | MM   | 1.5997      | 4221.63428   | 43.98330     | 50.4262 |

**Enantioenriched 13**

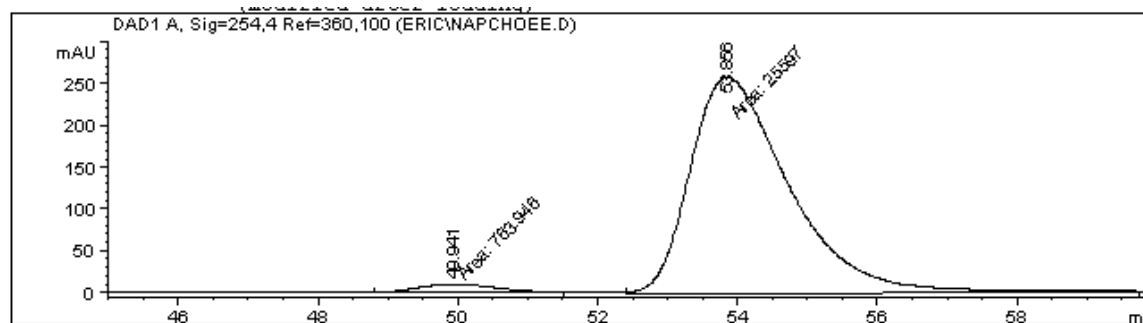

=====  
 Area Percent Report  
 =====

Sorted By : Signal  
 Multiplier : 1.0000  
 Dilution : 1.0000  
 Use Multiplier & Dilution Factor with ISTDs

Signal 1: DAD1 A, Sig=254,4 Ref=360,100

| Peak # | RetTime [min] | Type | Width [min] | Area [mAU*s] | Height [mAU] | Area %  |
|--------|---------------|------|-------------|--------------|--------------|---------|
| 1      | 49.941        | MM   | 1.3314      | 763.94629    | 9.56300      | 2.8980  |
| 2      | 53.856        | MM   | 1.6532      | 2.55970e4    | 258.05209    | 97.1020 |

**Racemic 14**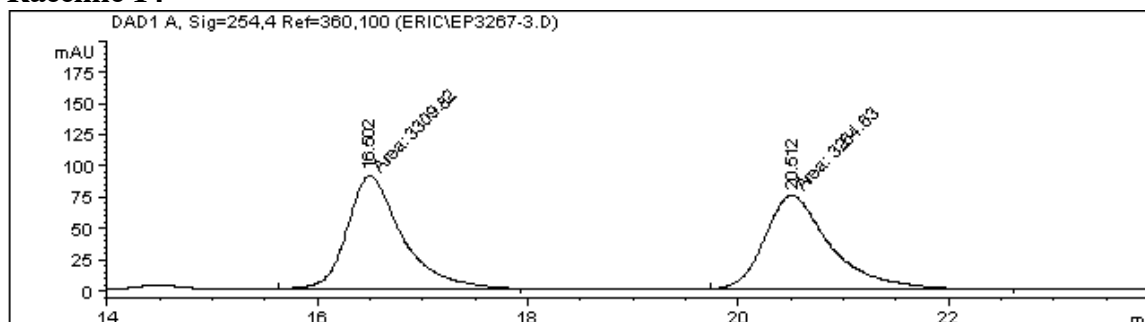

```

=====
                          Area Percent Report
=====
  
```

```

Sorted By      :      Signal
Multiplier     :      1.0000
Dilution      :      1.0000
Use Multiplier & Dilution Factor with ISTDs
  
```

Signal 1: DAD1 A, Sig=254,4 Ref=360,100

| Peak # | RetTime [min] | Type | Width [min] | Area [mAU*s] | Height [mAU] | Area %  |
|--------|---------------|------|-------------|--------------|--------------|---------|
| 1      | 16.502        | MM   | 0.6111      | 3309.81909   | 90.26875     | 50.3437 |
| 2      | 20.512        | MM   | 0.7298      | 3264.63086   | 74.55844     | 49.6563 |

**Enantioenriched 14**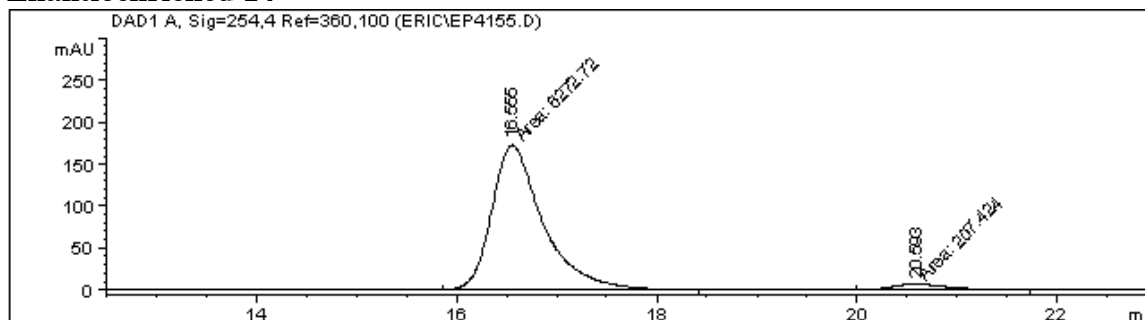

```

=====
                          Area Percent Report
=====
  
```

```

Sorted By      :      Signal
Multiplier     :      1.0000
Dilution      :      1.0000
Use Multiplier & Dilution Factor with ISTDs
  
```

Signal 1: DAD1 A, Sig=254,4 Ref=360,100

| Peak # | RetTime [min] | Type | Width [min] | Area [mAU*s] | Height [mAU] | Area %  |
|--------|---------------|------|-------------|--------------|--------------|---------|
| 1      | 16.555        | MM   | 0.6048      | 6272.71875   | 172.84526    | 96.7991 |
| 2      | 20.593        | MM   | 0.5948      | 207.42419    | 5.81236      | 3.2009  |

**Racemic 15**

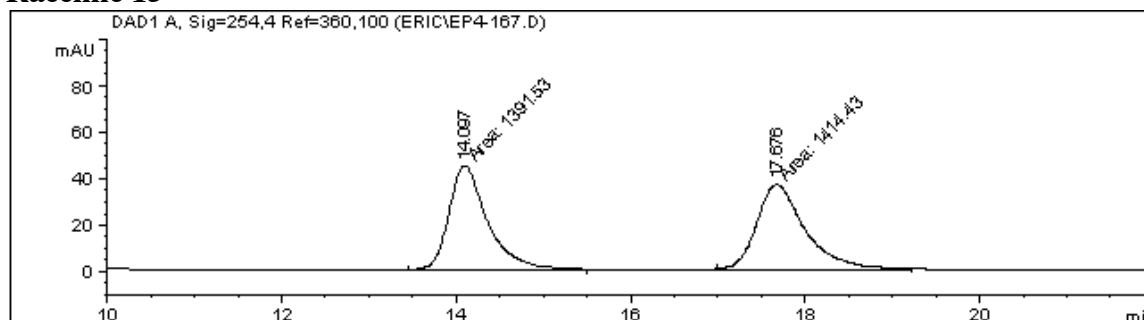

=====  
 Area Percent Report  
 =====

Sorted By : Signal  
 Multiplier : 1.0000  
 Dilution : 1.0000  
 Use Multiplier & Dilution Factor with ISTDs

Signal 1: DAD1 A, Sig=254,4 Ref=360,100

| Peak # | RetTime [min] | Type | Width [min] | Area [mAU*s] | Height [mAU] | Area %  |
|--------|---------------|------|-------------|--------------|--------------|---------|
| 1      | 14.097        | MM   | 0.5147      | 1391.53296   | 45.05816     | 49.5921 |
| 2      | 17.676        | MM   | 0.6437      | 1414.42664   | 36.62404     | 50.4079 |

**Enantioenriched 15**

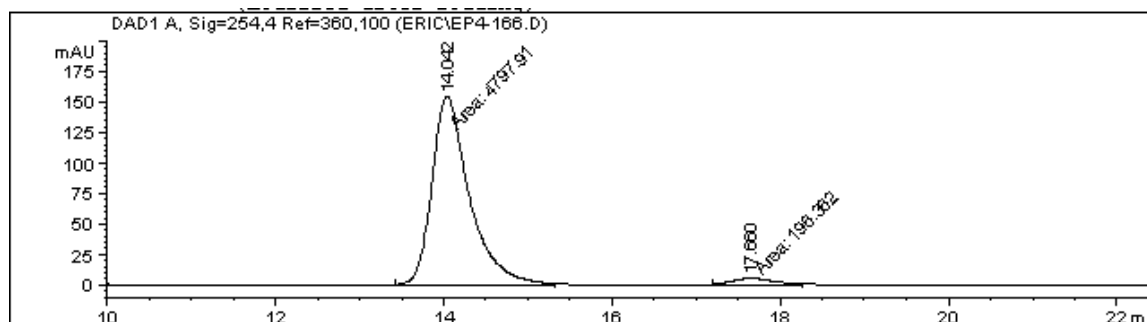

=====  
 Area Percent Report  
 =====

Sorted By : Signal  
 Multiplier : 1.0000  
 Dilution : 1.0000  
 Use Multiplier & Dilution Factor with ISTDs

Signal 1: DAD1 A, Sig=254,4 Ref=360,100

| Peak # | RetTime [min] | Type | Width [min] | Area [mAU*s] | Height [mAU] | Area %  |
|--------|---------------|------|-------------|--------------|--------------|---------|
| 1      | 14.042        | MM   | 0.5194      | 4797.91113   | 153.95663    | 96.0683 |
| 2      | 17.660        | MM   | 0.6248      | 196.36220    | 5.23771      | 3.9317  |



### X-Ray Crystallography of 7

X-ray diffraction was performed at  $-120\text{ }^{\circ}\text{C}$  and raw frame data were processed using SAINT. Molecular structure was solved using direct methods and refined by F2 by full-matrix least-squares techniques. The GOF = 0.975 for 261 variables refined to  $R1 = 0.0283$  for 6844 reflections with  $I > 2\sigma(I)$ . There was no absorption correction of Flack parameters. Further information is contained in the CIF file.

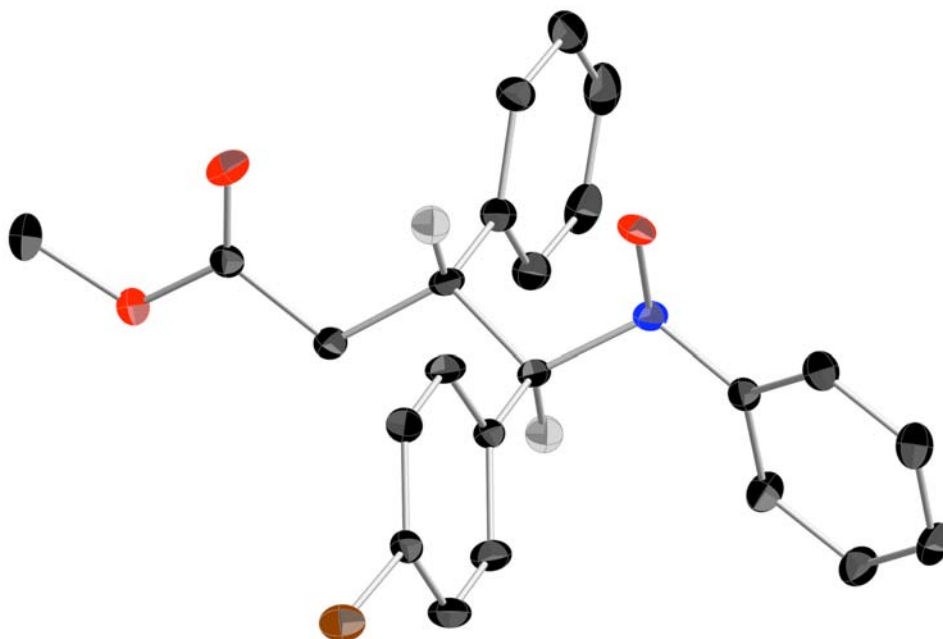

Supplement: NIHMS248683-supplement-J_Am_Chem__Soc__Supporting_Information.pdf [file NIHMS248683-supplement-J_Am_Chem__Soc__Supporting_Information.pdf]
